# Supplementary material for: Hypersensitivity of Primordial Germ Cells to Compromised Replication-Associated DNA Repair Involves ATM-p53-p21 Signaling
Source: PubMed Central journal article supplement (PMC4091704; doi:10.1371/journal.pgen.1004471), 2014-07-10

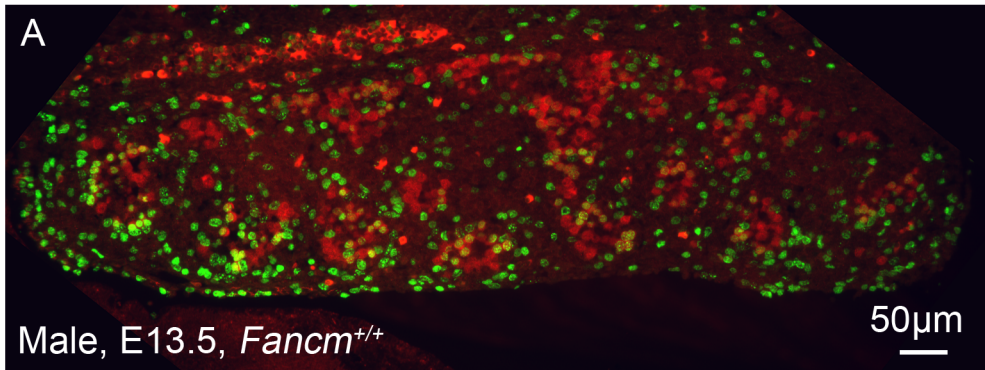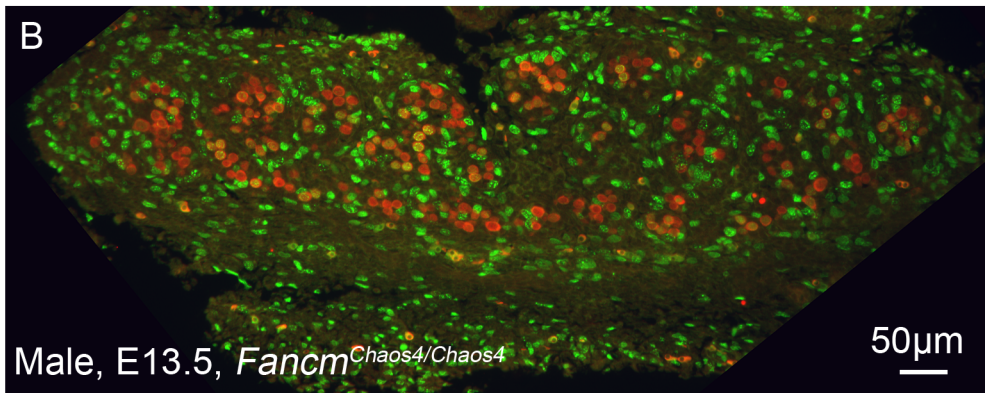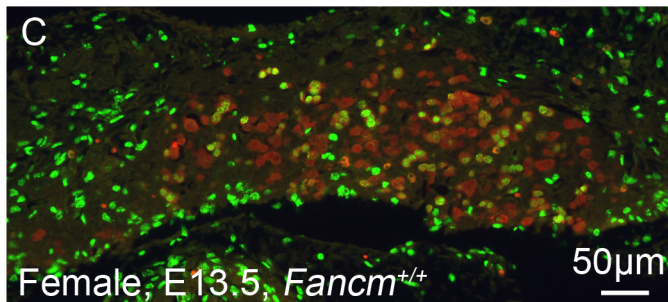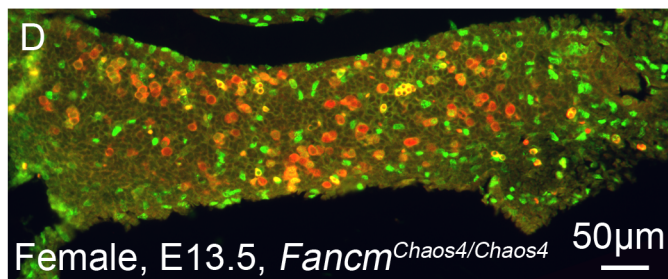

Supplement: pgen.1004471.s002.pdf [file pgen.1004471.s002.pdf]
